# Supplementary material
Source: publisher figshare collection journal article supplement (https://acs.figshare.com/ndownloader/files/13986377)
Supplement: Supplementary file 1 [file 13986377]

**Supporting Information:**

**PdSe<sub>2</sub>: Flexible Two-dimensional Transition  
Metal Dichalcogenides Monolayer for Water  
Splitting Photocatalyst with Extremely Low  
Recombination Rate**

*Chen Long<sup>†</sup>, Yan Liang<sup>†</sup>, Hao Jin<sup>\*,‡</sup>, Baibiao Huang<sup>†</sup>, and Ying Dai<sup>\*,†</sup>*

<sup>†</sup>School of Physics, State Key Laboratory of Crystal Materials, Shandong University, 250100 Jinan, P. R. China.

<sup>‡</sup>Shenzhen Key Laboratory of Advanced Thin Films and Applications, College of Physics and Energy, Shenzhen University, 518060 Shenzhen, P. R. China.

\*E-mail: [jh@szu.edu.cn](mailto:jh@szu.edu.cn) (H. J); [daiy60@sdu.edu.cn](mailto:daiy60@sdu.edu.cn) (Y. D)

## 1. Calculation method of HER and OER activity

**Table S1.** Zero-point energy correction ( $E_{ZPE}$ ), entropy contribution ( $TS$ ,  $T=298.15K$ ), total energy ( $E$ ), and the Gibbs free energy ( $G$ ) of molecules and adsorbates.

| Species | $E_{ZPE}$ (eV) | $-TS$ | $E$ (eV) | $G$ (eV) |
|---------|----------------|-------|----------|----------|
| $H_2$   | 0.27           | -0.41 | -6.77    | -6.91    |
| $H_2O$  | 0.56           | -0.67 | -14.22   | -14.33   |
| $OH^*$  | 0.29           | -0.21 | -116.53  | -116.45  |
| $O^*$   | 0.03           | -0.12 | -110.75  | -110.84  |
| $OOH^*$ | 0.35           | -0.25 | -121.31  | -121.21  |
| $H^*$   | 0.19           | -0.02 | -110.12  | -109.9   |

In the aqueous solution, the hydrogen evolution reaction can be written as:

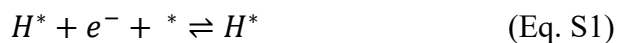

in which the  $*$  represents the adsorption site. Meanwhile, the oxygen evolution reaction processes a four-electron oxidation steps, which can be written as:

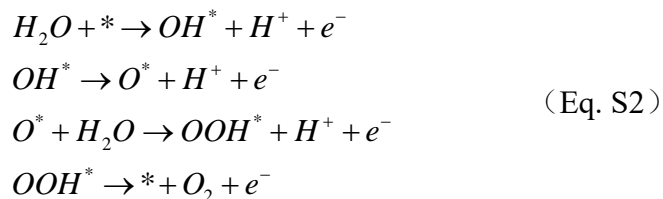

where  $OH^*$ ,  $O^*$  and  $OOH^*$  denote the adsorbed intermediates. Then, the free energy change ( $\Delta G$ ) can be express as:

$$\begin{aligned}
 \Delta G_1 &= G_{H^*} - 1/2 G_{H_2} + G^* \\
 \Delta G_2 &= G_{OH^*} + 1/2 G_{H_2} - G_{H_2O} \\
 \Delta G_3 &= G_{O^*} + 1/2 G_{H_2} - G_{OH} \\
 \Delta G_4 &= G_{OOH^*} + 1/2 G_{H_2} - G_{H_2O} - G_{O^*} \\
 \Delta G_5 &= G^* + 1/2 G_{H_2} - G_{O_2} - G_{OOH^*}
 \end{aligned} \quad (\text{Eq. S3})$$

**Table S2.** The calculated  $\Delta G$  of water oxidation and hydrogen reduction reactions for different sites of PdSe<sub>2</sub> monolayer. The most active sites for two reactions are highlight in red.

|                    | Pd (eV) | Se <sub>I</sub> (eV) | Se <sub>II</sub> (eV) |
|--------------------|---------|----------------------|-----------------------|
| Water Oxidation    | 2.155   | 2.75                 | 2.685                 |
| Hydrogen Reduction | 1.505   | 1.195                | 1.175                 |

## 2. AIMD simulation in liquid water

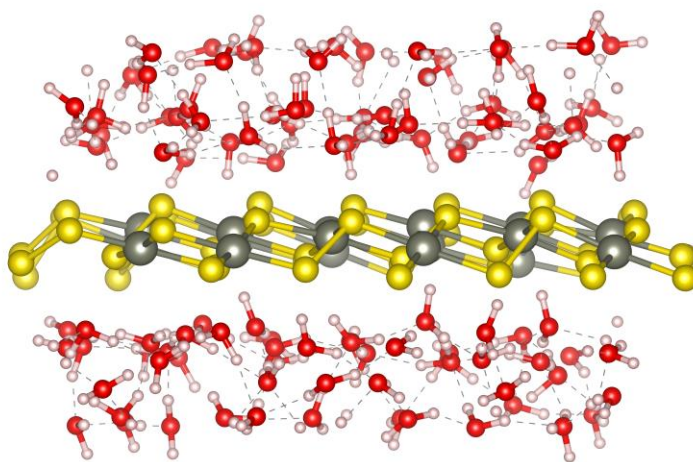

**Figure S1.** The structure evolution of the PdSe<sub>2</sub> monolayer in liquid water at 300 K for 10 ps. The yellow, grey, pink and red balls represent the Se, Pd, H and O atoms, respectively.
